# Supplementary material
Source: PubMed Central journal article supplement (PMC5831178)
Supplement: NIHMS940199-supplement-Supporting_Information.pdf [file NIHMS940199-supplement-Supporting_Information.pdf]

## Supporting Information

### **MnO<sub>2</sub> Nanotubes-based NanoSearchlight for Imaging of Multiple MicroRNAs in Live Cells**

*Qian Lu,<sup>†,‡</sup> Daniel Ericson,<sup>§, //</sup> Yang Song,<sup>†, //</sup> Chengzhou Zhu,<sup>†</sup> Ranfeng Ye,<sup>†</sup> Songqin Liu,*

*<sup>‡</sup> Joseph A. Sperryak,<sup>#</sup> Dan Du,<sup>†</sup> He Li,<sup>\*, †</sup> Yun Wu,<sup>\*, §</sup> Yuehe Lin<sup>\*, †</sup>*

<sup>†</sup>School of Mechanical and Material Engineering, Washington State University, Pullman,

Washington 99164, United States

<sup>‡</sup>School of Chemistry and Chemical Engineering, Southeast University, Nanjing, Jiangsu

211189, China

<sup>§</sup>Department of Biomedical Engineering, State University of New York at Buffalo,

Buffalo, New York 14260, United States

<sup>#</sup> Dept. of Cell Stress Biology, Roswell Park Cancer Institute, Buffalo, New York

14263, United States

**Table S1** Sequences of DNA probes.

|               | <b>Sequences</b>                   |
|---------------|------------------------------------|
| miRNA-155     | 5'-UUAAUGC UAAUCGUGAUAGGGGU-3'     |
| miRNA-21      | 5'-UAGCUUAUCAGACUGAUGUUGA-3'       |
| Cy5-ssDNA-155 | 5'-/Cy5/ACCCCTATCACGATTAGCATTAA-3' |
| Cy3-ssDNA-21  | 5'-/Cy3/TCAACATCAGTCTGATAAGCTA-3'  |
| Cy5-ODN       | 5'-Cy5-CAAGCTGATTACACCCGGTGA-3'    |

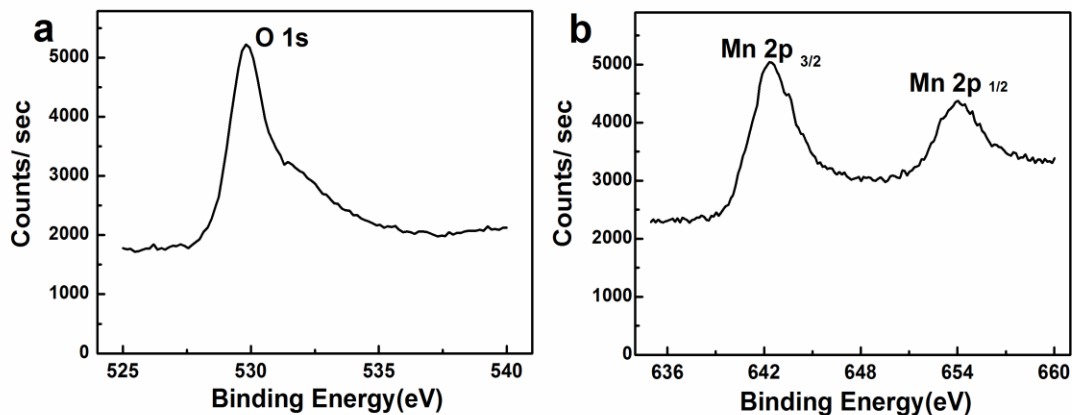

**Figure S1** X-ray photoelectron spectroscopy of MnO<sub>2</sub> nanotubes (a, b).

The peaks of O (1s), Mn (2p<sub>3/2</sub>) and Mn (2p<sub>1/2</sub>) were recorded at the binding energy of around 529.8 (a), 642.3 and 654.0 eV (b), indicating that KMnO<sub>4</sub> was converted to MnO<sub>2</sub> nanotubes reduced by PDDA.<sup>[1, 2]</sup>

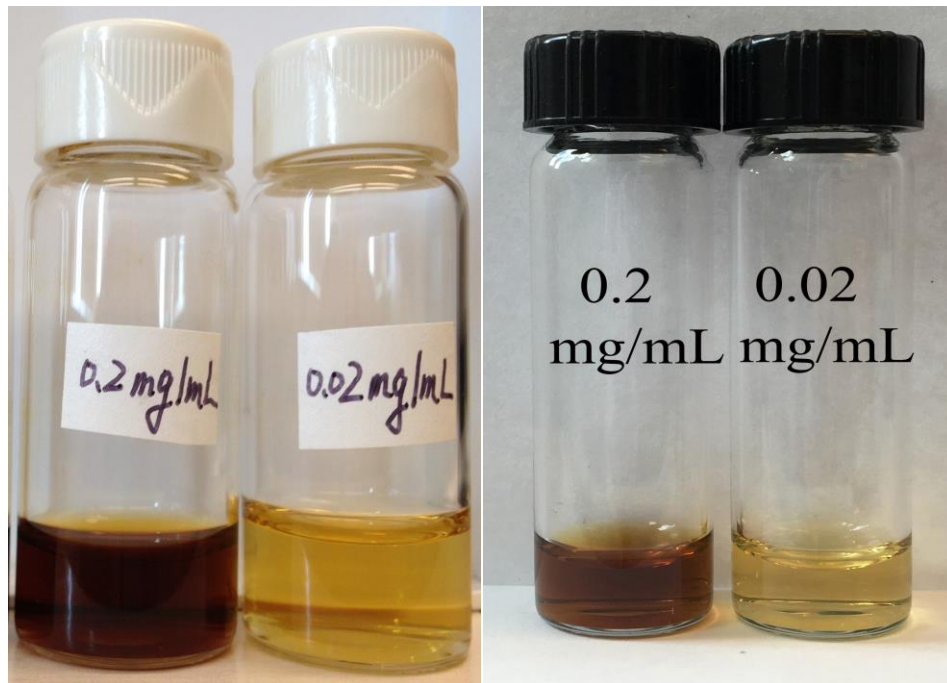

**Figure S2** Photos of MnO<sub>2</sub> nanotubes dispersed in water (left) and after 3 months (right).

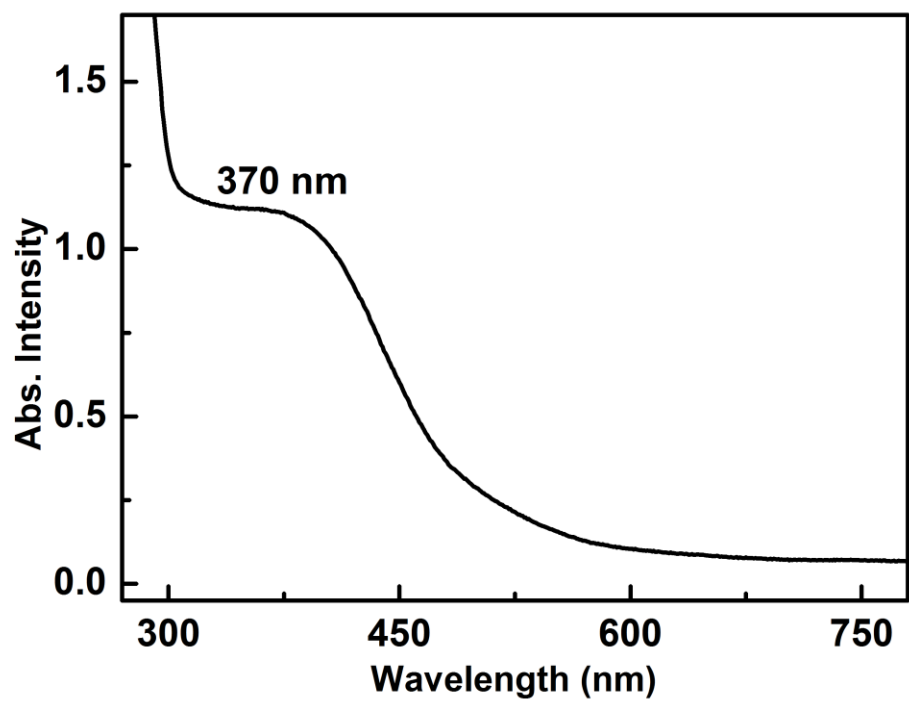

**Figure S3** UV-vis absorption spectrum of MnO<sub>2</sub> nanotubes.

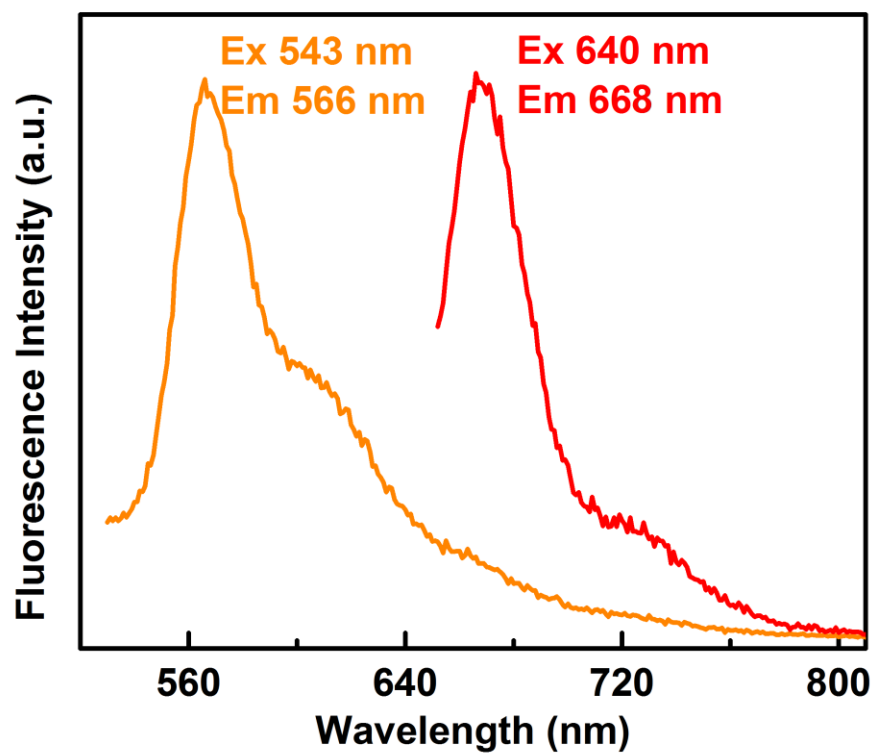

**Figure S4** Fluorescence spectra of Cy3-ssDNA-21 (orange) and Cy5-ssDNA-155 (red).

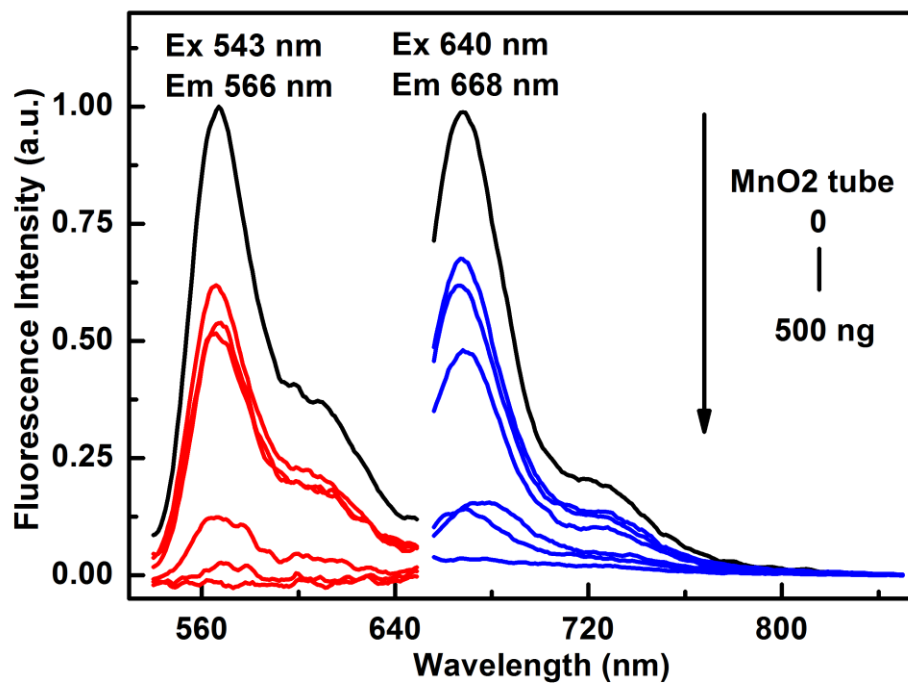

**Figure S5** Fluorescence quenching of Cy3-ssDNA-21 and Cy5-ssDNA-155 (5 nM) by different concentration of MnO<sub>2</sub> nanotubes (0, 50, 100, 150, 200, 350, 500 ng/mL) for 5 min.

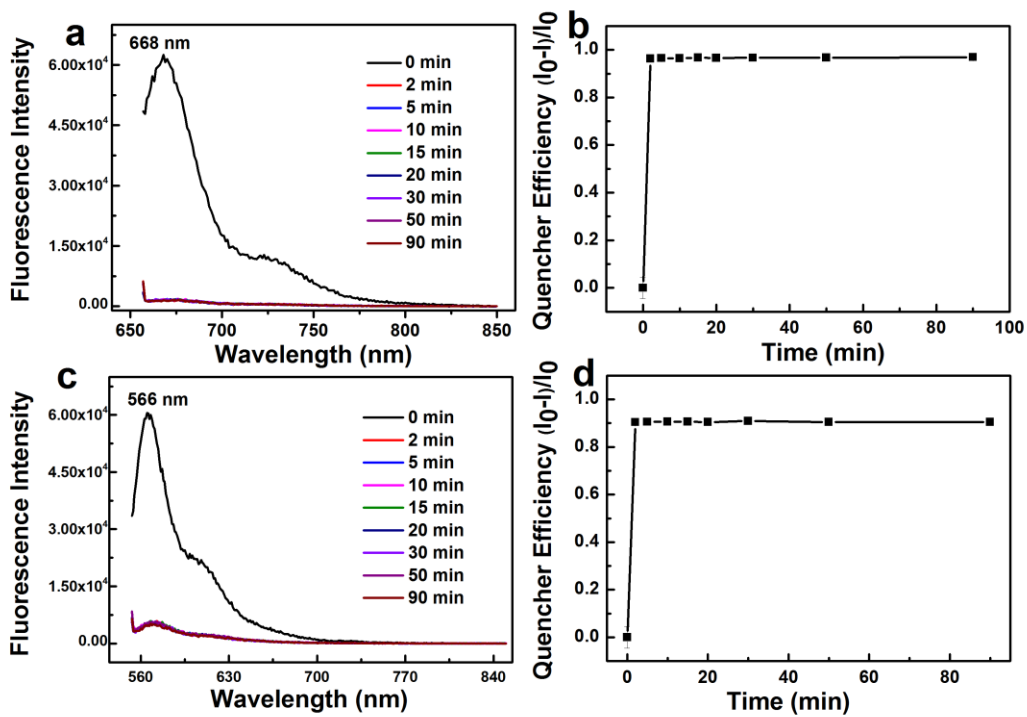

**Figure S6** Fluorescence quenching of Cy5-ssDNA-155 (5 nM) (a, b) and Cy3-ssDNA-21 (5 nM) (c, d) by MnO<sub>2</sub> nanotubes (500 ng/mL).



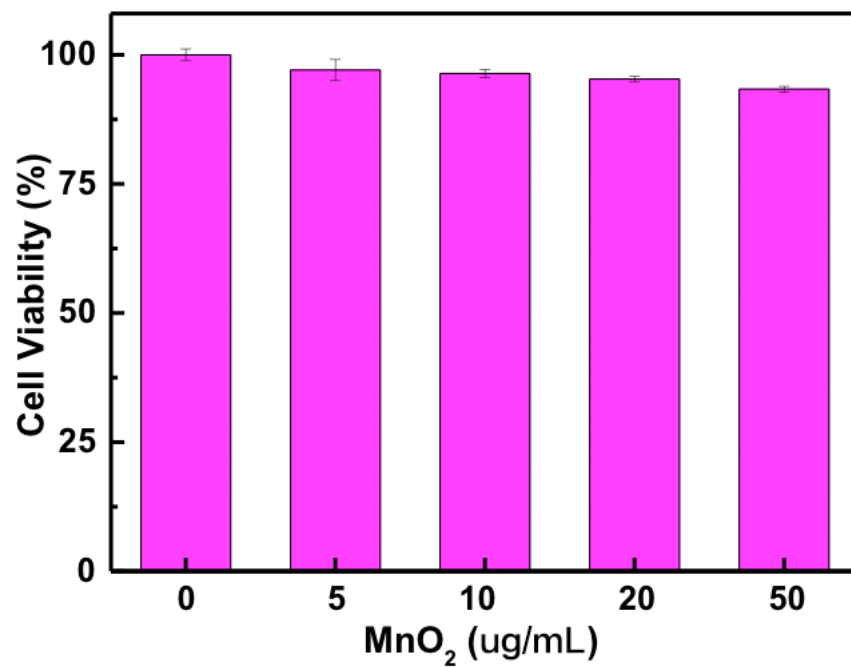

**Figure S7** Cytotoxicity of MnO<sub>2</sub> nanotubes in MCF-7 cells.

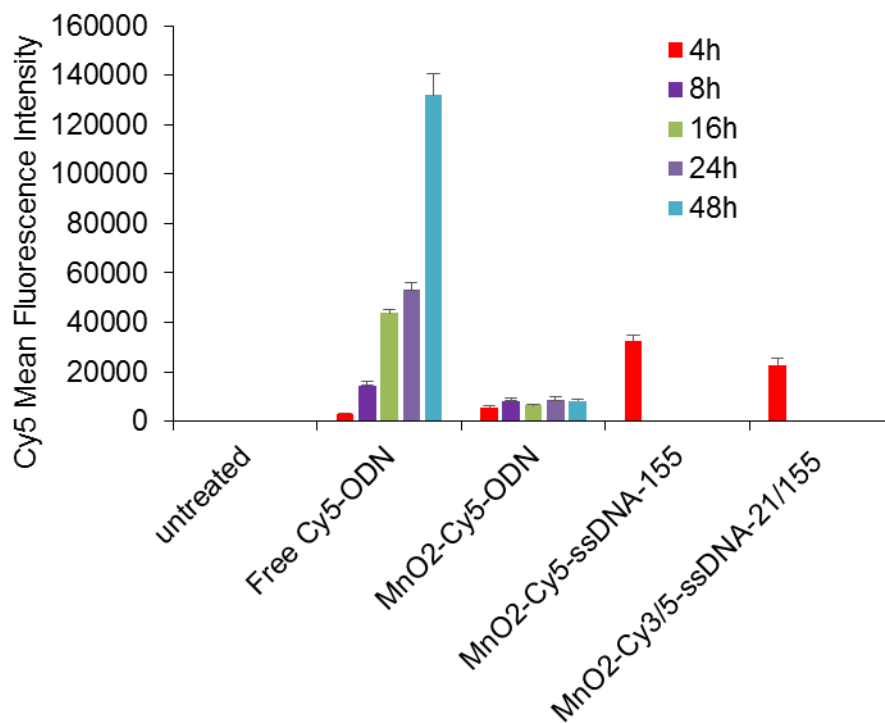

**Figure S8** Fluorescence intensity of Cy5 after MCF7 cells were treated with free Cy5-ODN and MnO<sub>2</sub>-Cy5-ODN, MnO<sub>2</sub>-Cy5-ssDNA-155 and MnO<sub>2</sub>-Cy3/5-ssDNA-21/155 at Cy5-ODN concentration of 100nM.

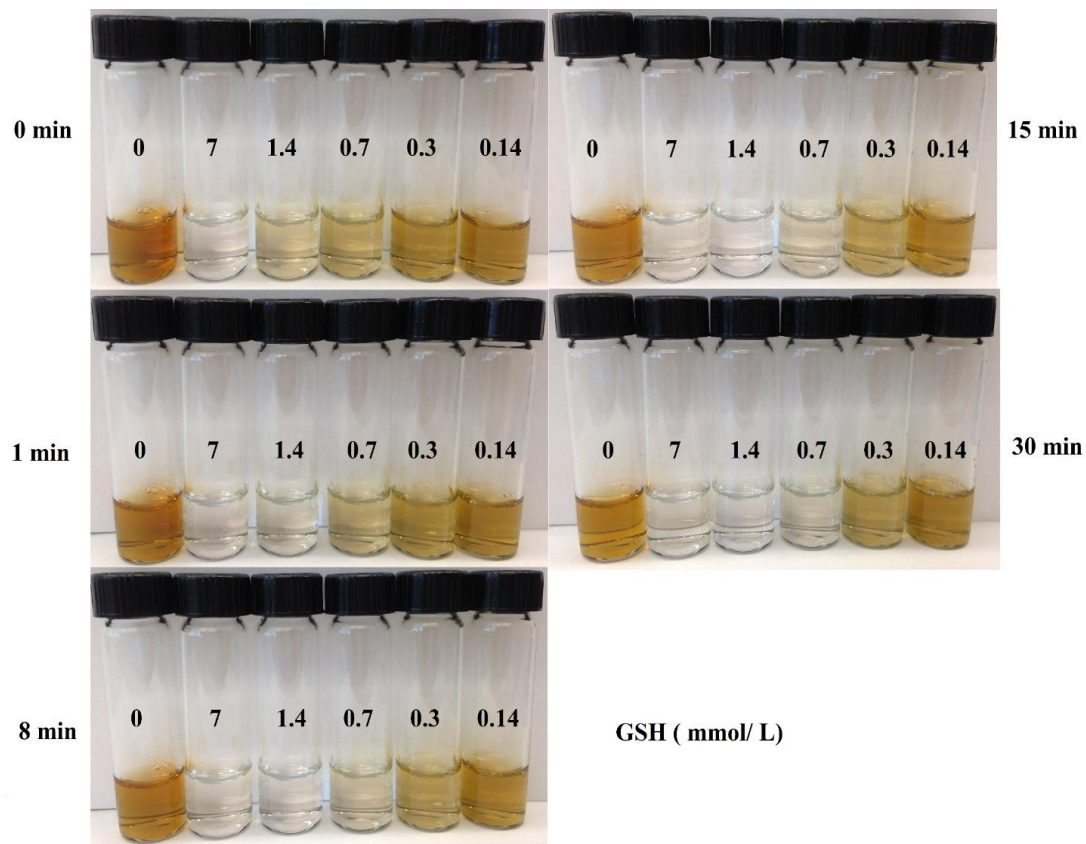

**Figure S9** Color changes of  $100 \mu\text{g mL}^{-1}$   $\text{MnO}_2$  nanotubes at 0, 1, 8, 15 and 30 min after treated with increasing concentration of GSH (0, 0.14, 0.3, 0.7, 1.4, 7.0 mM).

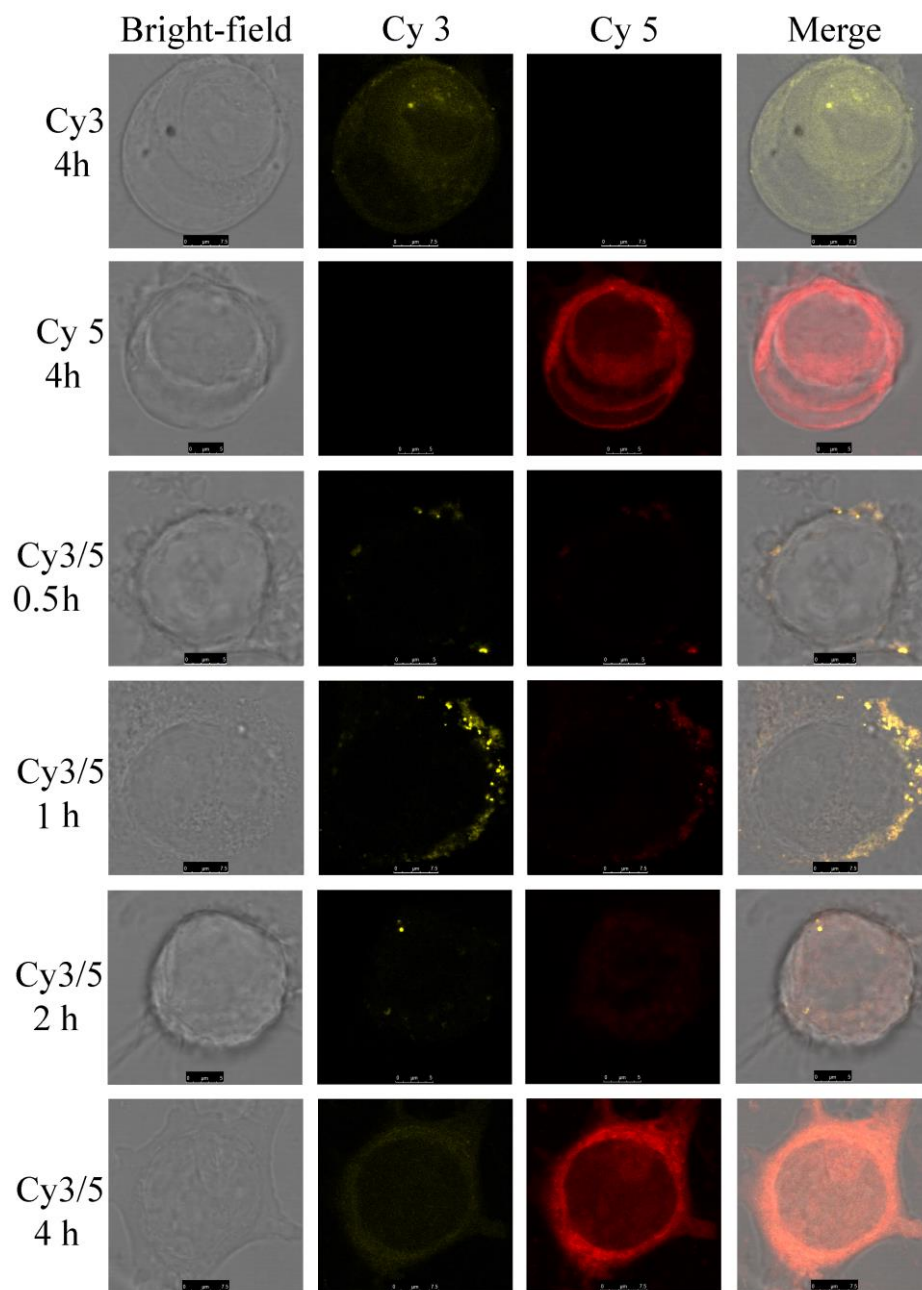

**Figure S10** Confocal microscopy images of MCF-7 single cells at 0.5, 1, 2, and 4 h after the MCF-7 cells were treated with MnO<sub>2</sub>-Cy3-ssDNA-21, MnO<sub>2</sub>-Cy5-ssDNA-155 and MnO<sub>2</sub>-Cy3-ssDNA-21/Cy5-ssDNA-155.

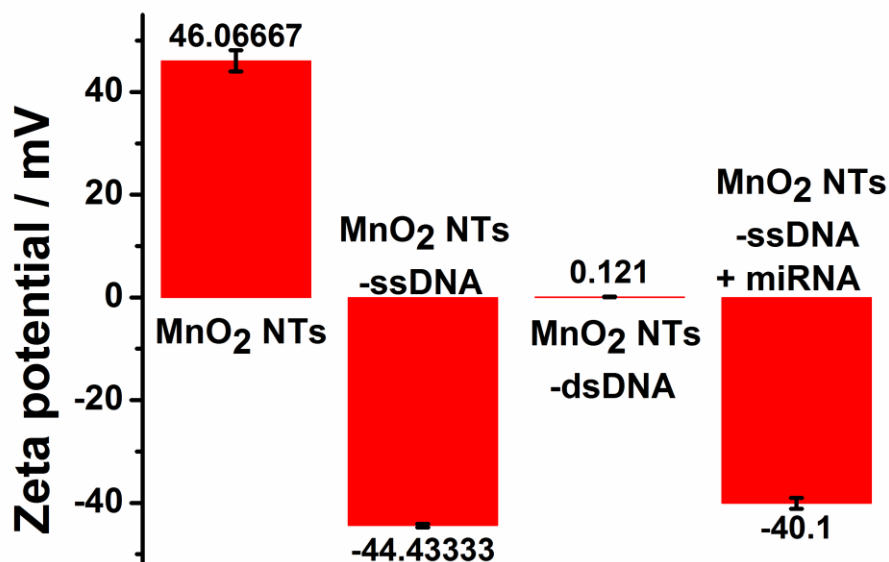

**Figure S11** Zeta potential of MnO<sub>2</sub> nanotubes (40.0 μg mL<sup>-1</sup>), MnO<sub>2</sub>- ssDNA (40.0 μg mL<sup>-1</sup> MnO<sub>2</sub> nanotubes were mixed with 0.2 μM Cy5-ssDNA-155 and 0.2 μM Cy3-ssDNA-21), MnO<sub>2</sub>- dsDNA (0.2 μM Cy5-ssDNA-155 and 0.2 μM miRNA 21, 0.2 μM Cy3-ssDNA-21 and 0.2 μM miRNA 155 was incubated at 37 °C in a water bath for 10 min. Then the two solutions were mixed and added to 40.0 μg mL<sup>-1</sup> MnO<sub>2</sub> nanotubes), MnO<sub>2</sub> NTs- ssDNA+ miRNA (40.0 μg mL<sup>-1</sup> MnO<sub>2</sub> nanotubes, 0.2 μM Cy5-ssDNA-155 and 0.2 μM Cy3-ssDNA-21 were mixed. After 5 min, 0.2 μM miRNA-155 and 0.2 μM miRNA-21 were added and the mixture was incubated at 37 °C in a water bath for 10 min).

#### References

- [1] Zhao, Z.; Fan, H.; Zhou, G.; Bai, H.; Liang, H.; Wang, R.; Zhang, X.; Tan, W. Activatable Fluorescence/MRI Bimodal Platform for Tumor Cell Imaging via MnO<sub>2</sub> Nanosheet–Aptamer Nanoprobe. *J. Am. Chem. Soc.* **2014**, *136*, 11220-11223.
- [2] Chen, Y.; Ye, D.; Wu, M.; Chen, H.; Zhang, L.; Shi, J.; Wang, L. Break-up of Two-Dimensional MnO<sub>2</sub> Nanosheets Promotes Ultrasensitive pH-Triggered Theranostics of Cancer. *Adv. Mater.* **2014**, *26*, 7019-7026.
